# Supplementary material for: Influence of Malnutrition on Outcome after Hip Fractures in Older Patients
Source: MDPI journal article supplement (doi:10.3390/jpm13010109), 2023-01-03
Supplement: s1 [file s1]

| Nr. | DoB      | Age | Sex<br>(1=female;<br>2=male) | Admission<br>[date] | Domicile<br>[1=own<br>home;<br>2=running<br>home] | Anticoagulant<br>[0=none;1=OAC;<br>AS/PA/c;<br>3=NOAC;<br>4=combination] | Osteoporosis<br>medication<br>[0=none;1=VIL + D;<br>2=cane/crutch;<br>3=combination] | Mobility<br>preference<br>[0=dependent;<br>1=cane/crutch;<br>2=walker; 3=only<br>indoor;<br>4=bedridden] | ASA [1- Surgery [date<br>4] | Anesthesia<br>[1=general;<br>2=other] | Implant<br>[1=DMS;2=oval;<br>3=oval;<br>open;4=THR;5=oste<br>synthesis] | Mobility 7th pod<br>[0=dependent;<br>1=cane/crutch;<br>2=walker; 3=walker;<br>4=bedridden] | Osteoporosis<br>medication [0=none;<br>1=V/D + calcium;<br>2=specific;<br>3=combination] | Discharge<br>[1=home;2=nursing<br>home;3=geriatric<br>rehabilitation;<br>4=rehabilitation;<br>5=hospital(4=death)] | discharge<br>postoperatively [d] | Readmission<br>[0=nc;1=yes] | Domicile<br>[1=home;2=running<br>home;3=hospital;<br>4=death] | Difference Domicile<br>[1=better;2=same;3=wor<br>se] | Mobility 12th podOP<br>[0=dependent;<br>1=cane/crutch; 2=walker;<br>3=only indoor;<br>4=bedridden;5=not<br>applicable] | Difference Mobility<br>[1=better;2=same;3=wor<br>se] | Height<br>[m] | Weight<br>[kg] | BMI | Nutritional<br>risk score | Albumin<br>[g/dl] | Total Protein<br>[g/dl] | Cholesterol<br>[mmol/l] | Total calcium<br>[mmol/l] | Vit. B12<br>[pg/ml] | Vit. D<br>[ng/ml] | Folic acid<br>[ng/ml] | Dietary<br>supplement |                           |      |   |  |
|-----|----------|-----|------------------------------|---------------------|---------------------------------------------------|--------------------------------------------------------------------------|--------------------------------------------------------------------------------------|----------------------------------------------------------------------------------------------------------|-----------------------------|---------------------------------------|-------------------------------------------------------------------------|--------------------------------------------------------------------------------------------|------------------------------------------------------------------------------------------|--------------------------------------------------------------------------------------------------------------------|----------------------------------|-----------------------------|---------------------------------------------------------------|------------------------------------------------------|------------------------------------------------------------------------------------------------------------------------|------------------------------------------------------|---------------|----------------|-----|---------------------------|-------------------|-------------------------|-------------------------|---------------------------|---------------------|-------------------|-----------------------|-----------------------|---------------------------|------|---|--|
| 1   | 26.07.40 | 77  | 1                            | 03.01.18            | 1                                                 | 0                                                                        | 0                                                                                    | 0                                                                                                        | 1                           | 2                                     | 03.01.18                                                                | 1                                                                                          | 3                                                                                        | 2                                                                                                                  | 3                                | 1                           | 19                                                            | 0                                                    | 1                                                                                                                      | 2                                                    | 1             | 1.55           | 49  | 21.78                     | 2                 | 3.19                    | 6.76                    | 7884                      | 4.58                | 121.7             | 47                    | 4.91                  | Fortimel compact          |      |   |  |
| 2   | 30.08.98 | 81  | 1                            | 03.01.18            | 1                                                 | 0                                                                        | 0                                                                                    | 0                                                                                                        | 0                           | 2                                     | 03.01.18                                                                | 1                                                                                          | 81                                                                                       | 2                                                                                                                  | 3                                | 1                           | 16                                                            | 0                                                    | 1                                                                                                                      | 2                                                    | 1             | 1.78           | 57  | 27.89                     | 2                 | 2.84                    | 6.022                   | 4.64                      | 217.7               | 4                 | 8.01                  |                       |                           |      |   |  |
| 3   | 04.08.36 | 72  | 2                            | 03.01.18            | 1                                                 | 0                                                                        | 0                                                                                    | 0                                                                                                        | 0                           | 2                                     | 04.01.18                                                                | 1                                                                                          | 2                                                                                        | 2                                                                                                                  | 1                                | 1                           | 16                                                            | 0                                                    | 1                                                                                                                      | 2                                                    | 1             | 1.7            | 72  | 24.91                     | 2                 | 2.89                    | 7.24                    | 6284                      | 4.42                | 342.7             | 3                     | 2.76                  |                           |      |   |  |
| 4   | 24.02.19 | 72  | 1                            | 04.01.18            | 1                                                 | 0                                                                        | 0                                                                                    | 0                                                                                                        | 0                           | 2                                     | 04.01.18                                                                | 1                                                                                          | 2                                                                                        | 2                                                                                                                  | 1                                | 1                           | 15                                                            | 0                                                    | 1                                                                                                                      | 2                                                    | 1             | 1.37           | 60  | 21.4                      | 2                 | 2.17                    | 4.59                    | 6099                      | 4.5                 | 195.9             | 25                    | 3.11                  |                           |      |   |  |
| 5   | 08.01.46 | 72  | 1                            | 12.01.18            | 1                                                 | 0                                                                        | 0                                                                                    | 0                                                                                                        | 1                           | 2                                     | 13.01.18                                                                | 1                                                                                          | 2                                                                                        | 2                                                                                                                  | 0                                | 1                           | 15                                                            | 0                                                    | 1                                                                                                                      | 2                                                    | 1             | 1.72           | 84  | 28.39                     | 2                 | 2.91                    | 7.86                    | 8786                      | 4.54                | 767               | 21                    | 12.28                 |                           |      |   |  |
| 6   | 09.12.43 | 74  | 1                            | 16.01.18            | 1                                                 | 0                                                                        | 0                                                                                    | 0                                                                                                        | 0                           | 0                                     | 16.01.18                                                                | 1                                                                                          | 2                                                                                        | 2                                                                                                                  | 1                                | 3                           | 22                                                            | 0                                                    | 1                                                                                                                      | 2                                                    | 0             | 2.155          | 50  | 20.81                     | 2                 | 2.77                    | 7.27                    | 3975                      | 4.42                | 528.7             | 3                     | 5.11                  | Freeusin                  |      |   |  |
| 7   | 06.03.86 | 81  | 1                            | 17.01.18            | 1                                                 | 0                                                                        | 0                                                                                    | 0                                                                                                        | 1                           | 3                                     | 17.01.18                                                                | 1                                                                                          | 2                                                                                        | 2                                                                                                                  | 1                                | 1                           | 15                                                            | 0                                                    | 1                                                                                                                      | 2                                                    | 1             | 1.52           | 60  | 21.4                      | 2                 | 2.32                    | 6.41                    | 6768                      | 4.32                | 914.7             | 3                     | 4.21                  | Providentia               |      |   |  |
| 8   | 27.07.38 | 79  | 1                            | 23.01.18            | 1                                                 | 0                                                                        | 3                                                                                    | 0                                                                                                        | 2                           | 3                                     | 25.01.18                                                                | 1                                                                                          | 4                                                                                        | 2                                                                                                                  | 1                                | 1                           | 14                                                            | 0                                                    | 1                                                                                                                      | 2                                                    | 1             | 1.6            | 50  | 19.53                     | 2                 | 2.45                    | 6.29                    | 6577                      | 4.08                | 495.6             | 3                     | 7.21                  | Fortimel compact          |      |   |  |
| 9   | 21.01.21 | 96  | 1                            | 25.01.18            | 2                                                 | 0                                                                        | 0                                                                                    | 0                                                                                                        | 3                           | 4                                     | 25.01.18                                                                | 1                                                                                          | 1                                                                                        | 4                                                                                                                  | 0                                | 1                           | 6                                                             | 0                                                    | 1                                                                                                                      | 5                                                    | 1             | 1.55           | 50  | 20.81                     | 2                 | 2.04                    | 6.35                    | 4416                      | 4.22                | 443.2             | 3                     | 2.4                   |                           |      |   |  |
| 10  | 25.12.34 | 83  | 1                            | 15.01.18            | 1                                                 | 0                                                                        | 0                                                                                    | 0                                                                                                        | 1                           | 3                                     | 16.01.18                                                                | 1                                                                                          | 2                                                                                        | 2                                                                                                                  | 1                                | 1                           | 20                                                            | 0                                                    | 1                                                                                                                      | 2                                                    | 1             | 1.64           | 80  | 29.74                     | 2                 | 2.97                    | 6.24                    | 5562                      | 4.18                | 791.1             | 3                     | 4.61                  |                           |      |   |  |
| 11  | 02.01.35 | 82  | 1                            | 29.01.18            | 1                                                 | 2                                                                        | 0                                                                                    | 0                                                                                                        | 2                           | 3                                     | 29.01.18                                                                | 1                                                                                          | 2                                                                                        | 2                                                                                                                  | 2                                | 1                           | 15                                                            | 0                                                    | 1                                                                                                                      | 2                                                    | 2             | 2.162          | 52  | 19.81                     | 2                 | 2.62                    | 6.61                    | 5095                      | 4.5                 | 321.4             | 4                     | 4.08                  | Fortimel compact          |      |   |  |
| 12  | 12.06.28 | 89  | 1                            | 29.01.18            | 1                                                 | 0                                                                        | 0                                                                                    | 0                                                                                                        | 2                           | 3                                     | 29.01.18                                                                | 1                                                                                          | 2                                                                                        | 2                                                                                                                  | 1                                | 1                           | 15                                                            | 0                                                    | 1                                                                                                                      | 2                                                    | 1             | 1.58           | 86  | 34.45                     | 2                 | 2.18                    | 6.64                    | 5504                      | 4.22                | 191.2             | 2                     | 3.64                  | Fortimel compact          |      |   |  |
| 13  | 14.06.29 | 88  | 1                            | 05.02.18            | 1                                                 | 0                                                                        | 0                                                                                    | 0                                                                                                        | 2                           | 4                                     | 05.02.18                                                                | 1                                                                                          | 4                                                                                        | 2                                                                                                                  | 1                                | 1                           | 6                                                             | 75                                                   | 0                                                                                                                      | 4                                                    | 3             | 1.67           | 78  | 27.97                     | 2                 | 3.1                     | 6.39                    | 4688                      | 4.16                | 301.9             | 3                     | 3.01                  | Fortimel compact          |      |   |  |
| 14  | 26.08.30 | 87  | 2                            | 08.02.18            | 1                                                 | 0                                                                        | 0                                                                                    | 0                                                                                                        | 3                           | 3                                     | 08.02.18                                                                | 1                                                                                          | 2                                                                                        | 3                                                                                                                  | 0                                | 1                           | 11                                                            | 0                                                    | 1                                                                                                                      | 2                                                    | 1             | 1.65           | 65  | 23.88                     | 2                 | 2.63                    | 5.6                     | 4708                      | 4.32                | 317.3             | 22                    | 3.23                  |                           |      |   |  |
| 15  | 14.01.41 | 76  | 2                            | 13.02.18            | 1                                                 | 2                                                                        | 1                                                                                    | 2                                                                                                        | 1                           | 3                                     | 13.02.18                                                                | 1                                                                                          | 2                                                                                        | 4                                                                                                                  | 0                                | 1                           | 15                                                            | 0                                                    | 1                                                                                                                      | 2                                                    | 1             | 1.75           | 70  | 22.86                     | 2                 | 2.88                    | 7.62                    | 5463                      | 4.64                | 321.5             | 3                     | 4.68                  |                           |      |   |  |
| 16  | 29.08.22 | 95  | 1                            | 15.02.18            | 2                                                 | 2                                                                        | 1                                                                                    | 1                                                                                                        | 2                           | 3                                     | 15.02.18                                                                | 1                                                                                          | 3                                                                                        | 2                                                                                                                  | 1                                | 2                           | 16                                                            | 0                                                    | 2                                                                                                                      | 2                                                    | 1             | 1.6            | 50  | 19.53                     | 2                 | 3.17                    | 7.04                    | 8399                      | 4.68                | 466               | 33                    | 31.18                 |                           |      |   |  |
| 17  | 06.11.22 | 85  | 2                            | 19.02.18            | 1                                                 | 0                                                                        | 0                                                                                    | 0                                                                                                        | 2                           | 3                                     | 19.02.18                                                                | 1                                                                                          | 2                                                                                        | 2                                                                                                                  | 1                                | 1                           | 15                                                            | 0                                                    | 1                                                                                                                      | 2                                                    | 1             | 1.68           | 63  | 23.21                     | 2                 | 3.15                    | 6.74                    | 4255                      | 4.58                | 309.4             | 6                     | 3.8                   |                           |      |   |  |
| 18  | 07.08.34 | 83  | 1                            | 28.02.18            | 1                                                 | 0                                                                        | 0                                                                                    | 0                                                                                                        | 0                           | 3                                     | 03.03.18                                                                | 1                                                                                          | 4                                                                                        | 2                                                                                                                  | 1                                | 1                           | 16                                                            | 0                                                    | 1                                                                                                                      | 2                                                    | 1             | 1.54           | 60  | 25.30                     | 2                 | 2.84                    | 8.37                    | 4970                      | 4.5                 | 764.4             | 19                    | 21.2                  |                           |      |   |  |
| 19  | 08.04.31 | 87  | 1                            | 10.03.18            | 2                                                 | 0                                                                        | 0                                                                                    | 0                                                                                                        | 3                           | 3                                     | 10.03.18                                                                | 1                                                                                          | 4                                                                                        | 2                                                                                                                  | 1                                | 2                           | 19                                                            | 0                                                    | 2                                                                                                                      | 2                                                    | 2             | 1.76           | 60  | 19.57                     | 2                 | 2.42                    | 6.68                    | 6888                      | 4.8                 | 307.9             | 24                    | 4.05                  |                           |      |   |  |
| 20  | 01.01.40 | 78  | 0                            | 13.03.18            | 1                                                 | 0                                                                        | 0                                                                                    | 0                                                                                                        | 2                           | 3                                     | 14.03.18                                                                | 1                                                                                          | 5                                                                                        | 1                                                                                                                  | 1                                | 1                           | 15                                                            | 0                                                    | 1                                                                                                                      | 2                                                    | 1             | 1.6            | 45  | 17.58                     | 2                 | 2.67                    | 6.8                     | 6012                      | 3                   | 8.56              |                       |                       |                           |      |   |  |
| 21  | 17.01.20 | 98  | 1                            | 23.03.18            | 1                                                 | 0                                                                        | 0                                                                                    | 0                                                                                                        | 1                           | 3                                     | 23.03.18                                                                | 1                                                                                          | 2                                                                                        | 2                                                                                                                  | 1                                | 3                           | 20                                                            | 0                                                    | 1                                                                                                                      | 2                                                    | 1             | 1.65           | 75  | 27.55                     | 2                 | 4.01                    | 7.38                    | 6201                      | 4.9                 | -                 | -                     | -                     |                           |      |   |  |
| 22  | 13.01.17 | 701 | 1                            | 25.03.18            | 1                                                 | 0                                                                        | 0                                                                                    | 0                                                                                                        | 2                           | 3                                     | 25.03.18                                                                | 1                                                                                          | 2                                                                                        | 2                                                                                                                  | 1                                | 1                           | 15                                                            | 0                                                    | 1                                                                                                                      | 2                                                    | 1             | 1.63           | 72  | 27.01                     | 2                 | 3.26                    | 7.1                     | 326                       | 4.1                 | 6647              | 4.68                  | 601.2                 | 33                        | 8.56 |   |  |
| 23  | 25.07.40 | 77  | 1                            | 04.04.18            | 1                                                 | 0                                                                        | 0                                                                                    | 0                                                                                                        | 2                           | 3                                     | 04.04.18                                                                | 1                                                                                          | 2                                                                                        | 2                                                                                                                  | 1                                | 3                           | 22                                                            | 1                                                    | 1                                                                                                                      | 2                                                    | 4             | 1.62           | 70  | 26.67                     | 2                 | 3.62                    | 6.748                   | 4.32                      | 267.1               | 3                 | 2.81                  |                       |                           |      |   |  |
| 24  | 02.12.33 | 84  | 1                            | 06.04.18            | 1                                                 | 0                                                                        | 0                                                                                    | 0                                                                                                        | 2                           | 2                                     | 06.04.18                                                                | 1                                                                                          | 2                                                                                        | 2                                                                                                                  | 1                                | 3                           | 24                                                            | 0                                                    | 1                                                                                                                      | 2                                                    | 2             | 1.6            | 50  | 19.53                     | 2                 | 2.7                     | 7.05                    | 6663                      | 4.8                 | 1627              | 12                    | 9.31                  |                           |      |   |  |
| 25  | 23.06.34 | 74  | 1                            | 02.04.18            | 1                                                 | 0                                                                        | 0                                                                                    | 0                                                                                                        | 2                           | 3                                     | 11.04.18                                                                | 1                                                                                          | 3                                                                                        | 2                                                                                                                  | 1                                | 1                           | 24                                                            | 0                                                    | 1                                                                                                                      | 2                                                    | 2             | 1.58           | 60  | 21.4                      | 2                 | 2.58                    | 6.88                    | 6420                      | 4.91                | 264.2             | 7                     | 3.51                  |                           |      |   |  |
| 26  | 28.07.28 | 89  | 1                            | 12.04.18            | 1                                                 | 0                                                                        | 0                                                                                    | 0                                                                                                        | 1                           | 4                                     | 12.04.18                                                                | 1                                                                                          | 3                                                                                        | 2                                                                                                                  | 1                                | 1                           | 18                                                            | 1                                                    | 1                                                                                                                      | 2                                                    | 2             | 1.6            | 60  | 23.44                     | 2                 | 2.53                    | 6.61                    | 7297                      | 4.56                | 232.5             | 35                    | 6.7                   |                           |      |   |  |
| 27  | 11.03.28 | 89  | 1                            | 14.04.18            | 2                                                 | 0                                                                        | 0                                                                                    | 0                                                                                                        | 3                           | 1                                     | 14.04.18                                                                | 2                                                                                          | 2                                                                                        | 3                                                                                                                  | 0                                | 2                           | 12                                                            | 0                                                    | 1                                                                                                                      | 2                                                    | 1             | 2.143          | 48  | 22.67                     | 2                 | 3.61                    | 6.35                    | 446                       | 4.46                | 107.9             | 3                     | 4.61                  |                           |      |   |  |
| 28  | 13.08.30 | 87  | 1                            | 15.04.18            | 1                                                 | 0                                                                        | 0                                                                                    | 0                                                                                                        | 3                           | 1                                     | 16.04.18                                                                | 1                                                                                          | 2                                                                                        | 2                                                                                                                  | 1                                | 1                           | 15                                                            | 0                                                    | 1                                                                                                                      | 2                                                    | 1             | 1.61           | 54  | 20.81                     | 2                 | 2.46                    | 7.27                    | 7451                      | 4                   | 4                 | 3.97                  | Fortimel compact      |                           |      |   |  |
| 29  | 07.08.32 | 85  | 1                            | 18.04.18            | 1                                                 | 0                                                                        | 0                                                                                    | 0                                                                                                        | 3                           | 1                                     | 19.04.18                                                                | 1                                                                                          | 4                                                                                        | 2                                                                                                                  | 1                                | 2                           | 19                                                            | 0                                                    | 2                                                                                                                      | 1                                                    | 1             | 1.72           | 76  | 25.69                     | 2                 | 1.83                    | 7.36                    | 5948                      | 4.08                | 124.7             | 3                     | 2.94                  | Freeusin                  |      |   |  |
| 30  | 02.01.30 | 88  | 1                            | 20.04.18            | 2                                                 | 0                                                                        | 0                                                                                    | 0                                                                                                        | 2                           | 1                                     | 21.04.18                                                                | 2                                                                                          | 1                                                                                        | 2                                                                                                                  | 1                                | 1                           | 16                                                            | 0                                                    | 1                                                                                                                      | 2                                                    | 1             | 1.62           | 75  | 28.58                     | 2                 | 1.62                    | 75                      | 28.58                     | 2                   | 1.61              | 7643                  | 4.62                  | 564.7                     | 10   | - |  |
| 31  | 20.04.33 | 85  | 2                            | 23.04.18            | 2                                                 | 2                                                                        | 1                                                                                    | 2                                                                                                        | 1                           | 2                                     | 24.04.18                                                                | 3                                                                                          | 4                                                                                        | 0                                                                                                                  | 2                                | 6                           | 12                                                            | 0                                                    | 4                                                                                                                      | 3                                                    | 5             | 1.8            | 82  | 25.31                     | 2                 | 2.72                    | 6.47                    | 5886                      | 4.58                | 240.8             | 38                    | 1.51                  |                           |      |   |  |
| 32  | 06.08.29 | 88  | 1                            | 23.04.18            | 1                                                 | 0                                                                        | 0                                                                                    | 0                                                                                                        | 4                           | 3                                     | 24.04.18                                                                | 1                                                                                          | 5                                                                                        | 4                                                                                                                  | 0                                | 2                           | 23                                                            | 0                                                    | 2                                                                                                                      | 4                                                    | 2             | 1.72           | 64  | 21.63                     | 2                 | 2.58                    | 7.03                    | 4858                      | 5.2                 | 456.7             | 35                    | 16.97                 |                           |      |   |  |
| 33  | 03.09.33 | 81  | 1                            | 03.04.18            | 1                                                 | 0                                                                        | 0                                                                                    | 0                                                                                                        | 3                           | 1                                     | 03.04.18                                                                | 2                                                                                          | 5                                                                                        | 2                                                                                                                  | 1                                | 1                           | 16                                                            | 0                                                    | 1                                                                                                                      | 2                                                    | 1             | 1.5            | 28  | 19.68                     | 2                 | 2.88                    | 6.22                    | 4278                      | 4.22                | 279.6             | 6                     | 1.5                   |                           |      |   |  |
| 34  | 08.07.27 | 92  | 1                            | 30.04.18            | 1                                                 | 0                                                                        | 0                                                                                    | 0                                                                                                        | 3                           | 3                                     | 30.04.18                                                                | 1                                                                                          | 2                                                                                        | 2                                                                                                                  | 1                                | 3                           | 17                                                            | 0                                                    | 1                                                                                                                      | 2                                                    | 3             | 2.18           | 58  | 17.90                     | 2                 | 2.38                    | 7.02                    | 4794                      | 4.46                | 722.6             | 14                    | 5.11                  | Fortimel compact          |      |   |  |
| 35  | 13.01.17 | 71  | 1                            | 30.04.18            | 1                                                 | 0                                                                        | 0                                                                                    | 0                                                                                                        | 2                           | 3                                     | 30.04.18                                                                | 1                                                                                          | 2                                                                                        | 2                                                                                                                  | 1                                | 1                           | 17                                                            | 0                                                    | 1                                                                                                                      | 2                                                    | 1             | 1.5            | 45  | 16.6                      | 2                 | 2.6                     | 7.19                    | 4.4                       | -                   | -                 | -                     | -                     |                           |      |   |  |
| 36  | 03.04.26 | 92  | 1                            | 30.04.18            | 2                                                 | 0                                                                        | 0                                                                                    | 0                                                                                                        | 3                           | 3                                     | 05.05.18                                                                | 1                                                                                          | 4                                                                                        | 2                                                                                                                  | 0                                | 2                           | 11                                                            | 0                                                    | 4                                                                                                                      | 3                                                    | 5             | 1.5            | 42  | 18.67                     | 2                 | 2.78                    | 6.36                    | 5716                      | 4.32                | 657.4             | 22                    | 3.88                  |                           |      |   |  |
| 37  | 11.02.39 | 79  | 2                            | 16.05.18            | 1                                                 | 0                                                                        | 0                                                                                    | 0                                                                                                        | 2                           | 2                                     | 16.05.18                                                                | 1                                                                                          | 4                                                                                        | 1                                                                                                                  | 1                                | 1                           | 17                                                            | 0                                                    | 1                                                                                                                      | 2                                                    | 0             | 2.168          | 77  | 27.28                     | 2                 | 3.21                    | 7.72                    | 4832                      | 4.64                | 476.6             | 15                    | 8.93                  |                           |      |   |  |
| 38  | 24.10.29 | 78  | 2                            | 18.05.18            | 1                                                 | 0                                                                        | 0                                                                                    | 0                                                                                                        | 2                           | 3                                     | 18.05.18                                                                | 1                                                                                          | 65                                                                                       | 1                                                                                                                  | 1                                | 1                           | 17                                                            | 0                                                    | 1                                                                                                                      | 2                                                    | 1             | 1.82           | 105 | 31.29                     | 2                 | 2.01                    | 6.47                    | 3845                      | 4.47                | 146.5             | 9                     | 6.29                  | Providentia               |      |   |  |
| 39  | 03.04.47 | 71  | 1                            | 30.05.18            | 1                                                 | 0                                                                        | 0                                                                                    | 0                                                                                                        | 2                           | 3                                     | 30.05.18                                                                | 1                                                                                          | 2                                                                                        | 1                                                                                                                  | 1                                | 1                           | 17                                                            | 0                                                    | 1                                                                                                                      | 2                                                    | 0             | 2.165          | 58  | 21.30                     | 2                 | 4.11                    | 7.56                    | 6916                      | 4.5                 | -                 | -                     | -                     |                           |      |   |  |
| 40  | 14.03.40 | 77  | 1                            | 12.06.18            | 1                                                 | 0                                                                        | 0                                                                                    | 0                                                                                                        | 2                           | 3                                     | 12.06.18                                                                | 1                                                                                          | 2                                                                                        | 2                                                                                                                  | 1                                | 1                           | 17                                                            | 0                                                    | 1                                                                                                                      | 2                                                    | 1             | 1.718          | 80  | 25.25                     | 2                 | 3.22                    | 7.18                    | 4591                      | 4.58                | 446.6             | 19                    | 11.88                 |                           |      |   |  |
| 41  | 29.08.39 | 78  | 1                            | 15.06.18            | 1                                                 | 0                                                                        | 0                                                                                    | 0                                                                                                        | 2                           | 3                                     | 15.06.18                                                                | 1                                                                                          | 2                                                                                        | 2                                                                                                                  | 1                                | 1                           | 17                                                            | 0                                                    | 1                                                                                                                      | 2                                                    | 1             | 1.65           | 70  | 25.25                     | 2                 | 2.68                    | 6.86                    | 5757                      | 4.62                | 242.2             | 3                     | 4.78                  |                           |      |   |  |
| 42  | 18.03.37 | 81  | 1                            | 18.06.18            | 2                                                 | 2                                                                        | 1                                                                                    | 2                                                                                                        | 1                           | 3                                     | 18.06.18                                                                | 2                                                                                          | 2                                                                                        | 2                                                                                                                  | 1                                | 1                           | 17                                                            | 0                                                    | 1                                                                                                                      | 2                                                    | 1             | 2.164          | 54  | 20.08                     | 2                 | 2.7                     | 6.32                    | 4118                      | 4.32                | 300.3             | 34                    | 6.11                  | Bioerga P + Fortimel Comp |      |   |  |
| 43  | 13.01.42 | 86  | 1                            | 26.06.18            | 1                                                 | 0                                                                        | 0                                                                                    | 0                                                                                                        | 2                           | 3                                     | 27.06.18                                                                | 1                                                                                          | 2                                                                                        | 2                                                                                                                  | 1                                | 1                           | 17                                                            | 0                                                    | 1                                                                                                                      | 2                                                    | 1             | 1.65           | 64  | 18.6                      | 2                 | 2.72                    | 6.82                    | 5737                      | 4.92                | 256.2             | 9                     | 6.51                  |                           |      |   |  |
| 44  | 27.07.29 | 88  | 1                            | 04.07.18            | 1                                                 | 3                                                                        | 0                                                                                    | 0                                                                                                        | 2                           | 3                                     | 04.07.18                                                                | 2                                                                                          | 2                                                                                        | 2                                                                                                                  | 1                                | 2                           | 16                                                            | 0                                                    | 1                                                                                                                      | 2                                                    | 1             | 1.65           | 65  | 20.88                     | 2                 | 2.71                    | 6.86                    | 6166                      | 4.66                | 192.7             | 4                     | 2.74                  |                           |      |   |  |
| 45  | 21.04.98 | 92  | 2                            | 26.06.18            | 1                                                 | 0                                                                        | 0                                                                                    | 0                                                                                                        | 2                           | 3                                     | 04.07.18                                                                | 2                                                                                          | 2                                                                                        | 2                                                                                                                  | 1                                | 2                           | 16                                                            | 0                                                    | 1                                                                                                                      | 2                                                    | 1             | 1.74           | 79  | 26.89                     | 2                 | 3.6                     | 8.29                    | 5677                      | 4.4                 | 244.4             | 48                    | 4.13                  |                           |      |   |  |
| 46  | 24.01.45 | 87  | 1                            | 09.07.18            | 1                                                 | 0                                                                        | 0                                                                                    | 0                                                                                                        | 3                           | 1                                     |                                                                         |                                                                                            |                                                                                          |                                                                                                                    |                                  |                             |                                                               |                                                      |                                                                                                                        |                                                      |               |                |     |                           |                   |                         |                         |                           |                     |                   |                       |                       |                           |      |   |  |

|     |          |     |   |          |   |    |   |   |   |          |   |   |   |   |   |    |   |   |   |   |   |     |     |       |       |      |      |      |      |       |       |      |       |          |
|-----|----------|-----|---|----------|---|----|---|---|---|----------|---|---|---|---|---|----|---|---|---|---|---|-----|-----|-------|-------|------|------|------|------|-------|-------|------|-------|----------|
| 127 | 02.04.44 | 75  | 2 | 17.06.19 | 1 | 1  | 1 | 1 | 3 | 17.06.19 | 1 | 2 | 2 | 1 | 3 | 14 | 0 | 1 | 2 | 3 | 3 | 182 | 105 | 31.70 | 2     | 3.06 | 6.34 | 6194 | 4.8  | 296.1 | 27    | 8.94 |       |          |
| 128 | 16.03.42 | 77  | 1 | 16.06.19 | 1 | 0  | 0 | 2 | 3 | 17.06.19 | 1 | 7 | 4 | 2 | 1 | 15 | 0 | 1 | 2 | 3 | 3 | 1   | 165 | 56    | 26.57 | 3    | 2.7  | 6.17 | 5037 | 4.32  | 519.4 | 26   | 2.61  | Fortimel |
| 129 | 03.10.38 | 80  | 2 | 17.06.19 | 2 | 4  | 0 | 0 | 3 | 18.06.19 | 1 | 2 | 4 | 1 | 2 | 15 | 0 | 2 | 2 | 3 | 3 | 2   | 175 | 70    | 22.86 | 3    | 2.49 | 7.03 | 7232 | 4.66  | 209.7 | 38   | 2.05  |          |
| 130 | 02.09.29 | 89  | 1 | 23.06.19 | 1 | 3  | 0 | 0 | 3 | 23.06.19 | 1 | 5 | 2 | 1 | 3 | 15 | 0 | 1 | 2 | 3 | 3 | 2   | 16  | 52    | 20.31 | 3    | 2.75 | 7.02 | 6416 | 4.42  | 239.4 | 31   | 7.28  |          |
| 131 | 18.06.29 | 90  | 2 | 11.07.19 | 2 | 4  | 0 | 0 | 4 | 11.07.19 | 1 | 7 | 4 | 2 | 6 | 15 | 0 | 1 | 2 | 3 | 3 | 2   | 175 | 70    | 22.86 | 3    | 2.41 | 7.42 | 7345 | 4.74  | 219.6 | 38   | 4.19  | Fortimel |
| 132 | 09.06.35 | 84  | 1 | 11.07.19 | 1 | 2  | 0 | 0 | 2 | 11.07.19 | 1 | 2 | 2 | 1 | 3 | 19 | 0 | 1 | 2 | 2 | 3 | 2   | 172 | 68    | 22.99 | 2    | 3.25 | 6.48 | 4146 | 4.2   | 795.5 | 13   | 14.3  |          |
| 133 | 16.04.26 | 84  | 1 | 11.07.19 | 1 | 2  | 0 | 0 | 0 | 11.07.19 | 1 | 2 | 2 | 1 | 3 | 14 | 0 | 1 | 2 | 2 | 3 | 2   | 154 | 54    | 21.56 | 3    | 2.64 | 7.12 | 6194 | 4.51  | 86.2  | 8    | 6.49  | Fortimel |
| 134 | 18.12.35 | 83  | 2 | 13.07.19 | 1 | 2  | 0 | 0 | 0 | 13.07.19 | 1 | 2 | 1 | 1 | 3 | 16 | 0 | 1 | 2 | 0 | 2 | 2   | 178 | 78    | 24.62 | 2    | 3.34 | 6.76 | 5840 | 4.32  | 206.5 | 27   | 5.58  |          |
| 135 | 14.08.24 | 94  | 1 | 25.07.19 | 1 | 1  | 0 | 0 | 1 | 26.07.19 | 1 | 4 | 2 | 1 | 3 | 16 | 0 | 1 | 2 | 2 | 3 | 2   | 164 | 50    | 18.59 | 4    | 2.83 | 7.29 | 3710 | 4.46  | 1514  | 75   | 6.78  |          |
| 136 | 30.11.27 | 90  | 1 | 27.07.19 | 1 | 0  | 0 | 0 | 2 | 27.07.19 | 1 | 4 | 2 | 1 | 3 | 16 | 0 | 1 | 2 | 2 | 3 | 2   | 167 | 58    | 21.44 | 3    | 2.36 | 7.12 | 5037 | 4.48  | 315.8 | 4    | 3.12  |          |
| 137 | 17.11.42 | 76  | 2 | 29.07.19 | 1 | 1  | 0 | 0 | 0 | 30.07.19 | 1 | 2 | 3 | 3 | 3 | 16 | 0 | 1 | 2 | 2 | 3 | 2   | 192 | 81    | 21.97 | 3    | 2.44 | 7.45 | 8366 | 4.64  | 175.6 | 10   | 2.51  |          |
| 138 | 17.05.30 | 89  | 1 | 02.08.19 | 1 | 2  | 0 | 0 | 0 | 02.08.19 | 1 | 2 | 4 | 2 | 1 | 17 | 0 | 1 | 2 | 2 | 3 | 2   | 17  | 76    | 26.20 | -    | 2.81 | 7.34 | 1916 | 4.51  | 161.9 | 26   | 27.81 |          |
| 139 | 13.02.49 | 70  | 2 | 16.08.19 | 2 | 0  | 0 | 0 | 0 | 16.08.19 | 1 | 2 | 2 | 1 | 3 | 16 | 0 | 1 | 2 | 2 | 3 | 2   | 167 | 60    | 16.67 | 4    | 2.41 | 7.35 | 1953 | 4.49  | 191.6 | 28   | 4.19  | Freusbin |
| 140 | 21.05.34 | 85  | 1 | 16.08.19 | 1 | 2  | 0 | 0 | 0 | 16.08.19 | 1 | 3 | 3 | 3 | 3 | 17 | 0 | 1 | 2 | 2 | 3 | 2   | 175 | 60    | 16.59 | 4    | 3.7  | 6.6  | 7875 | 4.82  | 145.5 | 20   | 3.07  | Obien    |
| 141 | 25.10.43 | 85  | 1 | 17.08.19 | 1 | 2  | 0 | 0 | 0 | 17.08.19 | 1 | 2 | 2 | 1 | 3 | 16 | 0 | 1 | 2 | 2 | 3 | 2   | 167 | 65    | 14.61 | 3    | 2.52 | 6.42 | 131  | 4.86  | 337.4 | 13   | 4.39  |          |
| 142 | 26.07.30 | 89  | 1 | 20.08.19 | 1 | 1  | 1 | 3 | 4 | 20.08.19 | 1 | 2 | 2 | 1 | 2 | 15 | 0 | 1 | 2 | 2 | 3 | 2   | 155 | 55    | 22.89 | 2    | 2.29 | 7.42 | 1300 | 4.58  | 1008  | 63   | 13.54 |          |
| 143 | 11.08.43 | 76  | 1 | 23.08.19 | 1 | 2  | 0 | 0 | 0 | 23.08.19 | 1 | 4 | 2 | 1 | 3 | 15 | 0 | 1 | 2 | 2 | 3 | 2   | 165 | 55    | 20.20 | 3    | 4.53 | 7.86 | 7675 | 5.26  | 1038  | 49   | 24.15 |          |
| 144 | 26.06.35 | 84  | 1 | 02.09.19 | 1 | 0  | 0 | 0 | 0 | 02.09.19 | 1 | 3 | 2 | 1 | 3 | 16 | 0 | 1 | 2 | 2 | 3 | 2   | 160 | 60    | 16.44 | 3    | 3.88 | 7.85 | 8135 | 4.77  | 1188  | 38   | 16.38 |          |
| 145 | 09.11.37 | 81  | 1 | 02.09.19 | 1 | 2  | 0 | 0 | 0 | 02.09.19 | 1 | 4 | 4 | 1 | 3 | 15 | 0 | 1 | 2 | 2 | 3 | 2   | 175 | 72    | 23.51 | 3    | 2.82 | 6.79 | 6151 | 4.78  | 475.9 | 24   | 3.92  |          |
| 146 | 31.10.38 | 90  | 1 | 03.09.19 | 1 | 0  | 0 | 0 | 0 | 03.09.19 | 1 | 4 | 4 | 1 | 3 | 14 | 0 | 1 | 2 | 2 | 3 | 2   | 158 | 63    | 21.49 | 3    | 2.85 | 6.48 | 7075 | 4.44  | 419.9 | 18   | 5.18  |          |
| 147 | 24.10.29 | 89  | 2 | 14.09.19 | 1 | 0  | 1 | 0 | 0 | 15.09.19 | 1 | 4 | 2 | 1 | 3 | 15 | 0 | 1 | 2 | 0 | 2 | 2   | 165 | 70    | 25.71 | 2    | 2.24 | 6.32 | 6140 | 4.46  | 582.1 | 37   | 16.8  |          |
| 148 | 08.10.40 | 78  | 1 | 16.09.19 | 1 | 1  | 1 | 2 | 3 | 16.09.19 | 1 | 2 | 2 | 1 | 3 | 18 | 0 | 1 | 2 | 2 | 3 | 2   | 155 | 55    | 22.89 | 3    | 2.78 | 7.02 | 5612 | 4.6   | 293.9 | 27   | 4.86  |          |
| 149 | 21.05.23 | 96  | 1 | 18.09.19 | 1 | 0  | 1 | 2 | 3 | 18.09.19 | 1 | 2 | 2 | 1 | 3 | 18 | 0 | 1 | 2 | 2 | 3 | 2   | 166 | 60    | 16.44 | 3    | 2.69 | 6.17 | 8097 | 4.54  | 398.2 | 6    | 3.94  | Fortimel |
| 150 | 09.04.25 | 94  | 1 | 20.09.19 | 1 | 0  | 0 | 2 | 2 | 20.09.19 | 1 | 2 | 2 | 1 | 3 | 16 | 0 | 1 | 2 | 2 | 3 | 2   | 160 | 60    | 16.44 | 3    | 2.69 | 6.17 | 8097 | 4.54  | 398.2 | 6    | 3.94  | Fortimel |
| 151 | 10.06.47 | 72  | 1 | 22.09.19 | 1 | 0  | 1 | 2 | 3 | 23.09.19 | 1 | 4 | 2 | 1 | 3 | 16 | 0 | 1 | 2 | 2 | 3 | 2   | 165 | 70    | 25.71 | 3    | 1.84 | 7.26 | 6279 | 4.56  | 911   | 3    | 5.21  |          |
| 152 | 16.03.31 | 88  | 1 | 30.09.19 | 2 | 3  | 0 | 0 | 3 | 01.10.19 | 1 | 3 | 4 | 0 | 2 | 15 | 0 | 1 | 2 | 2 | 3 | 2   | 165 | 70    | 25.71 | 3    | 1.84 | 7.26 | 6279 | 4.56  | 911   | 3    | 5.21  |          |
| 153 | 08.02.22 | 97  | 1 | 14.10.19 | 1 | 2  | 1 | 2 | 3 | 15.10.19 | 1 | 4 | 4 | 0 | 2 | 15 | 0 | 1 | 2 | 2 | 3 | 2   | 165 | 70    | 25.71 | 3    | 1.84 | 7.26 | 6279 | 4.56  | 911   | 3    | 5.21  |          |
| 154 | 08.05.45 | 74  | 1 | 17.10.19 | 1 | 2  | 1 | 2 | 3 | 17.10.19 | 1 | 4 | 4 | 0 | 2 | 15 | 0 | 1 | 2 | 2 | 3 | 2   | 165 | 70    | 25.71 | 3    | 1.84 | 7.26 | 6279 | 4.56  | 911   | 3    | 5.21  |          |
| 155 | 26.07.29 | 90  | 1 | 19.10.19 | 1 | 3  | 1 | 3 | 3 | 19.10.19 | 1 | 3 | 3 | 1 | 3 | 15 | 0 | 1 | 2 | 2 | 3 | 2   | 165 | 55    | 22.89 | 3    | 2.78 | 7.02 | 5612 | 4.6   | 293.9 | 27   | 4.86  |          |
| 156 | 13.07.30 | 89  | 1 | 21.10.19 | 2 | 0  | 1 | 3 | 3 | 21.10.19 | 1 | 2 | 2 | 1 | 3 | 15 | 0 | 1 | 2 | 2 | 3 | 2   | 154 | 50    | 18.59 | 2    | 2.81 | 6.16 | 2257 | 4.16  | 144.7 | 83   | 2.77  |          |
| 157 | 23.10.44 | 75  | 2 | 25.10.19 | 1 | 0  | 1 | 3 | 3 | 25.10.19 | 1 | 2 | 2 | 1 | 3 | 15 | 0 | 1 | 2 | 2 | 3 | 2   | 165 | 55    | 22.89 | 3    | 2.78 | 7.02 | 5612 | 4.6   | 293.9 | 27   | 4.86  |          |
| 158 | 30.11.25 | 93  | 1 | 01.11.19 | 1 | 0  | 1 | 3 | 3 | 01.11.19 | 1 | 2 | 2 | 1 | 3 | 17 | 0 | 1 | 2 | 2 | 3 | 2   | 166 | 60    | 16.44 | 3    | 2.69 | 6.17 | 8097 | 4.54  | 398.2 | 6    | 3.94  | Fortimel |
| 159 | 26.06.29 | 159 | 2 | 02.11.19 | 1 | 0  | 1 | 3 | 3 | 02.11.19 | 1 | 2 | 2 | 1 | 3 | 17 | 0 | 1 | 2 | 2 | 3 | 2   | 166 | 60    | 16.44 | 3    | 2.69 | 6.17 | 8097 | 4.54  | 398.2 | 6    | 3.94  | Fortimel |
| 160 | 22.01.26 | 93  | 1 | 06.11.19 | 1 | 3  | 1 | 3 | 3 | 06.11.19 | 1 | 4 | 2 | 3 | 3 | 17 | 0 | 1 | 2 | 2 | 3 | 2   | 166 | 60    | 16.44 | 3    | 2.69 | 6.17 | 8097 | 4.54  | 398.2 | 6    | 3.94  | Fortimel |
| 161 | 08.09.28 | 91  | 1 | 11.11.19 | 1 | 3  | 1 | 3 | 3 | 11.11.19 | 1 | 2 | 2 | 3 | 3 | 17 | 0 | 1 | 2 | 2 | 3 | 2   | 166 | 60    | 16.44 | 3    | 2.69 | 6.17 | 8097 | 4.54  | 398.2 | 6    | 3.94  | Fortimel |
| 162 | 05.01.34 | 85  | 1 | 05.11.19 | 1 | 26 | 1 | 3 | 3 | 05.11.19 | 1 | 2 | 2 | 3 | 3 | 17 | 0 | 1 | 2 | 2 | 3 | 2   | 166 | 60    | 16.44 | 3    | 2.69 | 6.17 | 8097 | 4.54  | 398.2 | 6    | 3.94  | Fortimel |
| 163 | 15.12.46 | 72  | 1 | 16.11.19 | 1 | 0  | 1 | 3 | 3 | 16.11.19 | 1 | 2 | 2 | 3 | 3 | 17 | 0 | 1 | 2 | 2 | 3 | 2   | 166 | 60    | 16.44 | 3    | 2.69 | 6.17 | 8097 | 4.54  | 398.2 | 6    | 3.94  | Fortimel |
| 164 | 10.12.18 | 80  | 2 | 17.11.19 | 1 | 0  | 1 | 3 | 3 | 17.11.19 | 1 | 2 | 2 | 3 | 3 | 17 | 0 | 1 | 2 | 2 | 3 | 2   | 166 | 60    | 16.44 | 3    | 2.69 | 6.17 | 8097 | 4.54  | 398.2 | 6    | 3.94  | Fortimel |
| 165 | 26.01.31 | 88  | 1 | 16.11.19 | 2 | 3  | 0 | 3 | 3 | 16.11.19 | 1 | 2 | 4 | 0 | 6 | 3  | 0 | 1 | 2 | 2 | 3 | 2   | 163 | 49    | 18.44 | 6    | 3.11 | 6.73 | 4988 | 4.78  | -     | -    | -     |          |
| 166 | 24.01.23 | 96  | 1 | 22.11.19 | 2 | 2  | 0 | 3 | 3 | 22.11.19 | 1 | 2 | 4 | 0 | 3 | 35 | 0 | 1 | 2 | 2 | 3 | 2   | 166 | 60    | 16.44 | 3    | 2.69 | 6.17 | 8097 | 4.54  | 398.2 | 6    | 3.94  | Fortimel |
| 167 | 13.11.24 | 84  | 1 | 25.11.19 | 1 | 3  | 4 | 1 | 3 | 25.11.19 | 1 | 4 | 2 | 3 | 3 | 35 | 0 | 1 | 2 | 2 | 3 | 2   | 166 | 60    | 16.44 | 3    | 2.69 | 6.17 | 8097 | 4.54  | 398.2 | 6    | 3.94  | Fortimel |
| 168 | 10.05.31 | 88  | 1 | 26.11.19 | 1 | 3  | 0 | 3 | 3 | 26.11.19 | 1 | 4 | 2 | 3 | 3 | 35 | 0 | 1 | 2 | 2 | 3 | 2   | 166 | 60    | 16.44 | 3    | 2.69 | 6.17 | 8097 | 4.54  | 398.2 | 6    | 3.94  | Fortimel |
| 169 | 06.07.37 | 85  | 1 | 29.11.19 | 1 | 3  | 0 | 3 | 3 | 29.11.19 | 1 | 4 | 2 | 3 | 3 | 35 | 0 | 1 | 2 | 2 | 3 | 2   | 166 | 60    | 16.44 | 3    | 2.69 | 6.17 | 8097 | 4.54  | 398.2 | 6    | 3.94  | Fortimel |
| 170 | 28.05.31 | 86  | 2 | 18.12.19 | 2 | 3  | 1 | 3 | 3 | 18.12.19 | 1 | 2 | 3 | 3 | 3 | 35 | 0 | 1 | 2 | 2 | 3 | 2   | 166 | 60    | 16.44 | 3    | 2.69 | 6.17 | 8097 | 4.54  | 398.2 | 6    | 3.94  | Fortimel |
| 171 | 24.01.38 | 81  | 2 | 02.10.20 | 1 | 2  | 0 | 3 | 3 | 02.10.20 | 1 | 4 | 1 | 3 | 3 | 35 | 0 | 1 | 2 | 2 | 3 | 2   | 166 | 60    | 16.44 | 3    | 2.69 | 6.17 | 8097 | 4.54  | 398.2 | 6    | 3.94  | Fortimel |
| 172 | 01.01.37 | 73  | 1 | 15.01.20 | 2 | 2  | 1 | 3 | 3 | 15.01.20 | 1 | 2 | 2 | 3 | 3 | 35 | 0 | 1 | 2 | 2 | 3 | 2   | 166 | 60    | 16.44 | 3    | 2.69 | 6.17 | 8097 | 4.54  | 398.2 | 6    | 3.94  | Fortimel |
| 173 | 01.06.23 | 96  | 1 | 15.01.20 | 2 | 2  | 1 | 3 | 3 | 15.01.20 | 1 | 2 | 2 | 3 | 3 | 35 | 0 | 1 |   |   |   |     |     |       |       |      |      |      |      |       |       |      |       |          |
